# Supplementary material
Source: MDPI journal article supplement (https://www.mdpi.com/2079-9276/9/5/58)
Supplement: s1 [file s1]

Questionnaire for the study (Italy):

## **Examining visitor perceptions of geological features at thermal tourism sites.**

**(The case of Terme San Giovanni in the Siena clay lands of Tuscany)**

F. Ugolini, A. Chrobak, D. Pearlmutter, A. Raschi  
Institute of Biometeorology – National Research Council

In collaboration with

Department of Geology, Pedagogical University of Cracow (Poland)

&

Blaustein Institutes for Desert Research, Ben-Gurion University of the Negev (Israel)

Dear sir / madam,

Rapolano Terme and Terme San Giovanni are located on the North-East edge of the area of the Crete Senesi, famous for the beauty of the landscape, mainly due to the spectacular morphology. However, the area is also rich in relevant geological features. Nearby the spa for instance, there are travertine caves, hot springs, but also other things: a fissure ridge with travertine formation (Montagnola) and a depression where a CO<sub>2</sub> lake forms every night (Bossoleto).

**We invite you to answer some questions in order to help us evaluate these resources for tourism exploitation, and promote geotourism** (tourism related to the knowledge of geomorphological – land form / geological features for those people interested in observing and gaining knowledge.

1. **Gender:** Male Female
2. **Age:**.....
3. **Town where you live:**..... **Country:**.....

**About You:**

- I am a visitor (e.g. tourist)
- I deliver tourist services (e.g. accommodation, restaurants..)

**4. Are you interested in geography and earth/landscape knowledge?**

- Yes  No  Not so much  I don't know

**5. You are here (only one option):**

- alone
- with your family/partner
- with your friend/s
- with your colleague/s

**6. How many days are you going to stay here (only one option)**

- one
- two
- less than a week
- more than a week
- other: .....

**7. Reasons to be here**

|                                                   | Very important | Rather important | Little important | Not important | I don't know |
|---------------------------------------------------|----------------|------------------|------------------|---------------|--------------|
| To learn new things                               |                |                  |                  |               |              |
| To relax and rest                                 |                |                  |                  |               |              |
| To escape from the daily life routine             |                |                  |                  |               |              |
| To have fun                                       |                |                  |                  |               |              |
| To meet people with similar interests and hobbies |                |                  |                  |               |              |
| To travel with friends and my family              |                |                  |                  |               |              |
| To explore new places                             |                |                  |                  |               |              |
| Suggested by my family and friends                |                |                  |                  |               |              |

**8. Which of these activities have you practiced in the area of Crete Senesi? (more than one option is allowed)**

- Biking
- Hiking
- Excursions to towns/villages
- Excursions to cultural monuments
- Excursions to natural sites
- Horse riding
- Birdwatching
- Nature photography
- Other:.....

**9. Which of these land forms / geological elements have you seen in the area of Crete Senesi (more than one option is allowed)**

- Badlands
- Haddoks land forms

- Faults
- Soil erosion
- Quarries
- Thermal water springs

**10. What would you like to know more in depth about the area of Crete Senesi (only one option)**

- Agriculture
- Food
- History
- Geology & Land forms
- Thermal water
- Flora and fauna

**11. Which of these geological natural elements have you visited/seen near the spa?**

- Travertine quarry of Campo Muri
- Bossoleto Sign
- Artesian well with thermal water
- Montagnola
- Archeological excavations in Campo Muri
- None of them

**12. Though you have not visited them, on the basis of the description given in the table and by the interviewer, try to assess the attractiveness (Scientific/ Cognitive/ Aesthetic) of the features for geotourism purpose**

|                                                             | Quarry | Bossoleto mofette | Geyser | Fissure ridge | Archeological excavations |
|-------------------------------------------------------------|--------|-------------------|--------|---------------|---------------------------|
| does not match the interest of the general public           |        |                   |        |               |                           |
| is known only to a few public                               |        |                   |        |               |                           |
| is well known but it does not match popularity among public |        |                   |        |               |                           |
| is quite popular                                            |        |                   |        |               |                           |
| is very well known by general public                        |        |                   |        |               |                           |
| I don't know                                                |        |                   |        |               |                           |

**13. Now, even though you have not visited them, on the basis of the description given in the table and by the interviewer, try to assess the accessibility of the features for geotourism purpose**

|                                                          | Quarry | Bossoleto mofette | Geyser | Fissure ridge | Archeological excavations |
|----------------------------------------------------------|--------|-------------------|--------|---------------|---------------------------|
| is hidden, hard to locate                                |        |                   |        |               |                           |
| is difficult to access but visible from a short distance |        |                   |        |               |                           |
| is accessible only in special occasions                  |        |                   |        |               |                           |
| is quite popular                                         |        |                   |        |               |                           |
| is highly visible and accessible                         |        |                   |        |               |                           |
| I don't know                                             |        |                   |        |               |                           |

**Travertine quarry** of Campo Muri. The oldest travertine dates back to ~25 thousand years ago.

Location: 700 m northwards from the spa

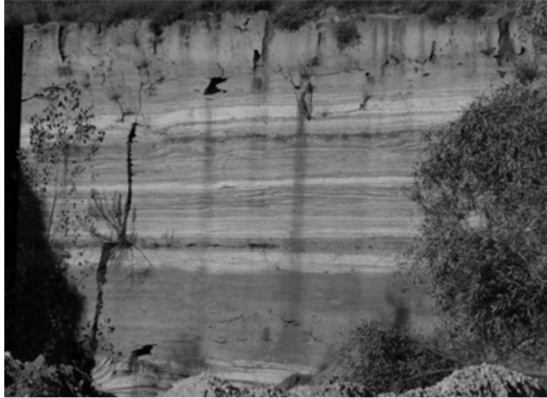

**Bossoleto Sign.** Natural scientific laboratory due to CO<sub>2</sub> springs. Here, scientists study the effects of high atmospheric CO<sub>2</sub> concentrations on ecosystem. Every night a CO<sub>2</sub> lake forms, and disappears at daytime.

Location: right side of the street going toward the spa, 150 m eastwards far from the spa.

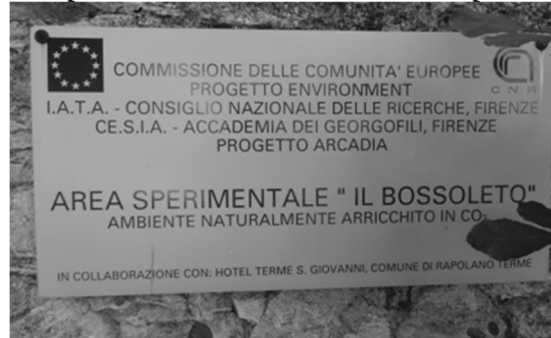

**Artesian well of thermal water.** Hot water comes out at about 40 °C. This water is characterized by high concentration of carbonate.

Location: 30 m from the spa (south-eastwards)

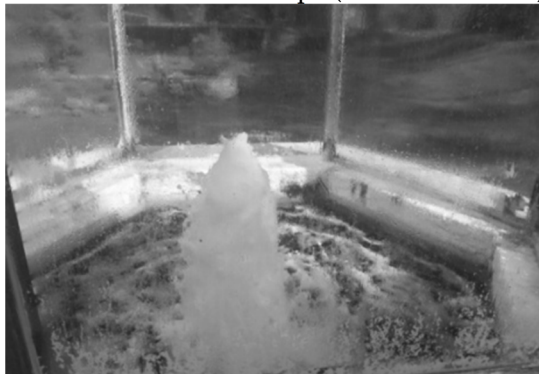

**Montagnola.** It is a travertine fissure ridge about 10 m high and 250 m long with active formation of travertine.

Location: 20-200 m from the spa (south-eastwards)

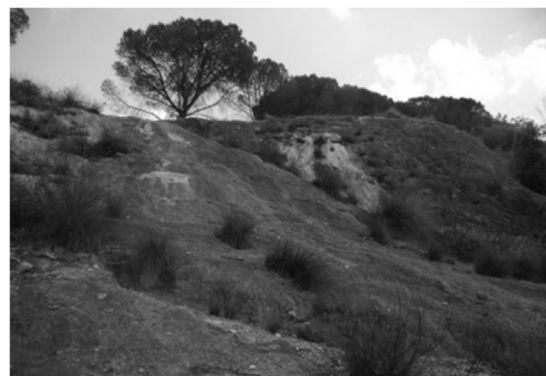

**Archeological excavations in Campo Muri** date back to Etruscans and Romans. Location: 700 m northwards from the spa

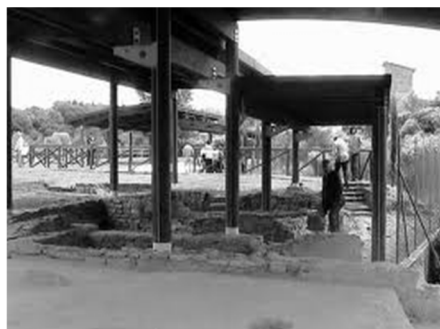

**14. Which of the following means would you improve/suggest in the area of Crete Senesi**

| Accessibility     | Very important | Rather important | Little important | Not important | I don't know |
|-------------------|----------------|------------------|------------------|---------------|--------------|
| 1 Local transport |                |                  |                  |               |              |
| 2 Bicycle routes  |                |                  |                  |               |              |
| 3 Hiking trails   |                |                  |                  |               |              |
| 4 Roads           |                |                  |                  |               |              |

- I don't know
- Nothing to improve

**15. Which means have you used to know about this area in general (more than one option is allowed)**

- On site material (posters, panels, leaflets)
- Internet
- Maps
- Books, magazines, etc.
- Tourist office
- Hotel/Restaurant
- Friends/people
- Personal experiences
- Other.....
- I haven't searched for any information

**16. If you received information about the area, how was it (only one option)**

- Complete, exhaustive
- Brief and concise
- Basic
- Bad

**17. Which means of information would you suggest for each geological element?**

|                                           | Very important | Rather important | Little important | Not important |
|-------------------------------------------|----------------|------------------|------------------|---------------|
| 1 Informative panels in each element site |                |                  |                  |               |
| 2 Information on Apps for mobile devices  |                |                  |                  |               |
| 3 Virtual tour                            |                |                  |                  |               |
| 4 Guided tour                             |                |                  |                  |               |
| 5 Leaflets                                |                |                  |                  |               |

- I don't know
- Nothing to improve
- I am not interested

Notes:

Thank you very much for the collaboration.

Questionnaire for the study (Slovakia):

## **Examining the tourism value of geological landscape features: The case of Kúpele Vyšné Ružbachy - Slovakia**

A. Chrobak, F. Ugolini, D. Pearlmutter, A. Raschi

Institute of Geography, Department of Geology, Pedagogical University of Cracow  
(Poland)

In collaboration with

Institute of Biometeorology – National Research Council (Italy)

&

Blaustein Institutes for Desert Research, Ben-Gurion University of the Negev (Israel)

Dear sir / madam,

Kúpele Vyšné Ružbachy are located on the North-East edge of the area of the Spiš Region, famous for the beauty of the landscape, mainly due to the spectacular morphology. However, the area is also rich in relevant geological features. Nearby the spa for instance, there are travertine craters, springs, waterfalls, etc.

**We invite you to answer some questions in order to help us evaluate these resources for tourism exploitation, and promote geotourism** (tourism related to the knowledge of geomorphological – land form / geological features for those people interested in observing and gaining knowledge (The researcher, 2009).

**1. Personal details:**

---

Gender: Male Female

Age:.....

Town where you live:.....

Country:.....

**About You:**

I am a visitor (e.g. tourist)

I deliver tourist services (e.g. accommodation, restaurants..)

**Are you interested in geography and earth/landscape knowledge?**

Yes  No  Not so much  I don't know

**Reasons to be here (rate which of the reasons is the most important for you (6) or not important (1)):**

|                                                         |                        |   |   |   |   |   |   |  |  |
|---------------------------------------------------------|------------------------|---|---|---|---|---|---|--|--|
|                                                         | <b>Knowledge</b>       |   |   |   |   |   |   |  |  |
| To increase my knowledge                                |                        | 1 | 2 | 3 | 4 | 5 | 6 |  |  |
|                                                         | <b>Relaxation</b>      |   |   |   |   |   |   |  |  |
| To relax and rest                                       |                        | 1 | 2 | 3 | 4 | 5 | 6 |  |  |
|                                                         | <b>Escape</b>          |   |   |   |   |   |   |  |  |
| To escape from the daily life routine                   |                        | 1 | 2 | 3 | 4 | 5 | 6 |  |  |
|                                                         | <b>Enjoyment</b>       |   |   |   |   |   |   |  |  |
| To have fun                                             |                        | 1 | 2 | 3 | 4 | 5 | 6 |  |  |
|                                                         | <b>Friendship</b>      |   |   |   |   |   |   |  |  |
| To meet people with similar interests and hobbies       |                        | 1 | 2 | 3 | 4 | 5 | 6 |  |  |
| To travel with friends and my family                    |                        | 1 | 2 | 3 | 4 | 5 | 6 |  |  |
|                                                         | <b>Sense of Wonder</b> |   |   |   |   |   |   |  |  |
| To explore new places                                   |                        | 1 | 2 | 3 | 4 | 5 | 6 |  |  |
| Because my family and friends suggested me to come here |                        | 1 | 2 | 3 | 4 | 5 | 6 |  |  |

**1. You are here (choose only one answer):**

alone

with your family/partner

with your friend/s

with your colleague/s

**2. How many days are you going to stay here (choose only one answer):**

one

two

less than a week

more than a week

other: .....

# Tourism-Geotourism in Spiš Region

**Spiš Region** are famous for their gentle hills, river valleys and gorges due to the specific geological background.

**3. Which of these activities have you practiced in the area of Spiš Region during your stay? (select more than one option if needed)**

- Biking
- Hiking
- Excursions to towns/villages
- Excursions to cultural monuments
- Excursions to natural sites
- Horse riding
- Birdwatching
- Nature photography
- Thermal bath/cures
- Other:.....

**4. Which of these land forms / geological elements have you seen in the area of Spiš Region during your staying? (select more than one option if needed)**

- Gorges
- Landslides
- Faults
- Single rocks
- Quarries
- Thermal water springs

**5. What would you like to know more in depth about the area of Spiš Region (Choose only one option)**

- Agriculture
- Food
- History
- Geology & Land forms
- Thermal water
- Flora and fauna

| <b>6. Accessibility</b><br>Have you used these kind of ways? | YES, it was very good | YES, it was satisfactory | YES, but it was not good | No |
|--------------------------------------------------------------|-----------------------|--------------------------|--------------------------|----|
| 1 Local transport                                            |                       |                          |                          |    |
| 2 Bicycle routes                                             |                       |                          |                          |    |
| 3 Hiking trails                                              |                       |                          |                          |    |
| 4 Roads                                                      |                       |                          |                          |    |

| <b>7. Which of the following means of Information would you improve in the area of Spiš Region</b> | Very important | More or less important | Little important | Not important | I don't know |
|----------------------------------------------------------------------------------------------------|----------------|------------------------|------------------|---------------|--------------|
| 1 Informative panels in important landscape sites                                                  |                |                        |                  |               |              |
| 2 Information on Apps for mobile devices                                                           |                |                        |                  |               |              |
| 3 Virtual tour                                                                                     |                |                        |                  |               |              |
| 4 Guided vehicular/hiking tours                                                                    |                |                        |                  |               |              |
| 5 Leaflets in all tourist places (visitor centres, hotels, agritourism etc.)                       |                |                        |                  |               |              |
| 6 Scenic flights                                                                                   |                |                        |                  |               |              |



## Geotourism in Kúpele Vyšné Ružbachy?

Nearby the Kúpele Vyšné Ružbachy there are important natural elements and witnesses of ancient activities linked to the geology of this area.

**Crater Travertine lake.** The unique formation, the biggest and only one of its type crater in Slovakia filled mineral water.

Location: eastern part of the spa, close to the Switzerland houses.

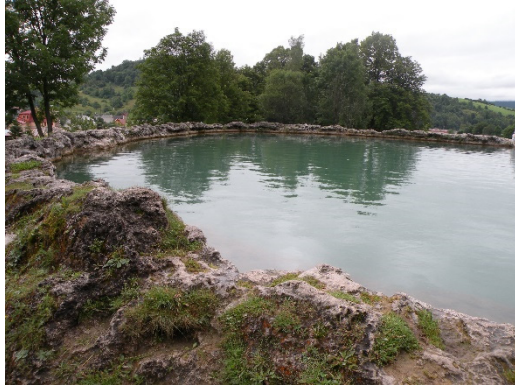

**White House.** Dominant White House was opened in 1931. It's a copy of one of the Monte Carlo palaces. The building is perfectly composed to the travertine background.

Location: central part of the area of Kúpele Vyšné Ružbachy

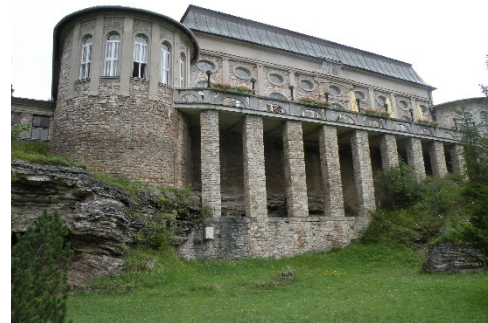

**CO<sub>2</sub> Crater.** Dry travertine crater. Dangerous because of the extraction of CO and fumaroles

Location: north-east part of the spa

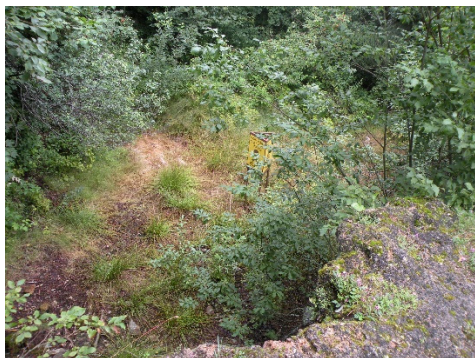

**Waterfall.** It is a travertine waterfall raised every year, located on the slope below the Water Crater

Location: 30 m below the Water Crater

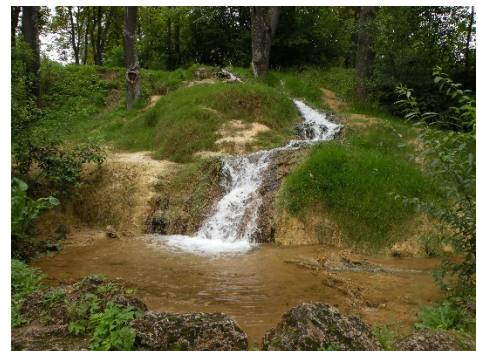

**Mineral spring.** The area of the Kúpele Vyšné Ružbachy, because of its geological background is full of mineral springs. This is one of the examples. Location: the southern part of the spa

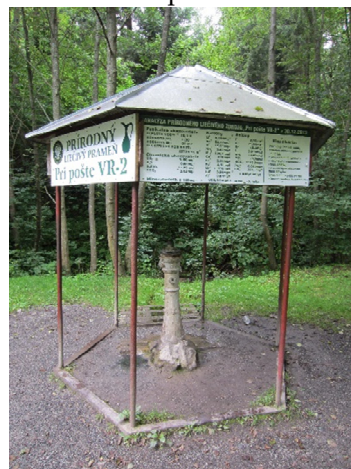

**8. Which of these geological natural elements have you visited/seen?**

- Crater Travertine Lake
- White House
- CO<sub>2</sub> Crater
- Waterfall
- Mineral Spring
- None of them

**9. Now, even though you have not visited them, try to assess the attractiveness (Scientific/ Cognitive/ Aesthetic) and accessibility of the whole area for geotourism purpose**

**Attractiveness (Choose only one option)**

- The area does not match the interest of the general public
- The area is known only to a few public interested in geological features
- The area is well known for professionals but it does not interest to the general public
- The area is quite popular
- The area is very well known by general public
- I don't know

**Accessibility (Choose one or two options)**

- The area is remote: it is not close to a road or trail
- The area is close to a road (the road is far close with respect to the main routes)
- The area is accessible by road and local transport (train or bus)
- The area is accessible by bicycle
- The area is accessible by a marked hiking trail

**Specifically:**

|                                                             | <b>Crater travertine lake</b> | <b>White House</b> | <b>CO<sub>2</sub> Crater</b> | <b>Waterfall</b> | <b>Mineral Spring</b> |
|-------------------------------------------------------------|-------------------------------|--------------------|------------------------------|------------------|-----------------------|
| <b>Attractiveness</b>                                       |                               |                    |                              |                  |                       |
| does not match the interest of the general public           |                               |                    |                              |                  |                       |
| is known only to a few public                               |                               |                    |                              |                  |                       |
| is well known but it does not match popularity among public |                               |                    |                              |                  |                       |
| is quite popular                                            |                               |                    |                              |                  |                       |
| is very well known by general public                        |                               |                    |                              |                  |                       |
| I don't know                                                |                               |                    |                              |                  |                       |

|                                                          | <b>Crater travertine lake</b> | <b>White House</b> | <b>CO<sub>2</sub> Crater</b> | <b>Waterfall</b> | <b>Mineral Spring</b> |
|----------------------------------------------------------|-------------------------------|--------------------|------------------------------|------------------|-----------------------|
| <b>Accessibility</b>                                     |                               |                    |                              |                  |                       |
| is hidden, hard to locate                                |                               |                    |                              |                  |                       |
| is difficult to access but visible from a short distance |                               |                    |                              |                  |                       |
| is accessible only in special occasions                  |                               |                    |                              |                  |                       |
| is quite popular                                         |                               |                    |                              |                  |                       |
| is highly visible and accessible                         |                               |                    |                              |                  |                       |
| I don't know                                             |                               |                    |                              |                  |                       |

**10. How important are the following items for attracting tourists in your opinion**

| <b>Attractiveness</b>                                  | Very important | More or less important | Little important | Not important | I don't know |
|--------------------------------------------------------|----------------|------------------------|------------------|---------------|--------------|
| 1 Landscape of the area                                |                |                        |                  |               |              |
| 2 Information about natural/geological elements nearby |                |                        |                  |               |              |
| 3 The activities the guests can access                 |                |                        |                  |               |              |
| 4 The existence of traditional food                    |                |                        |                  |               |              |
| 5 The proximity to major cities and their monuments    |                |                        |                  |               |              |
| 6 The effectiveness of local transport                 |                |                        |                  |               |              |
| 7 Other aspects.....                                   |                |                        |                  |               |              |

| <b>Means of information</b>               | YES | NO | I don't know |
|-------------------------------------------|-----|----|--------------|
| 1 Informative panels in each element site |     |    |              |
| 2 Information on Apps for mobile devices  |     |    |              |
| 3 Virtual tour                            |     |    |              |
| 4 Guided tour                             |     |    |              |
| 5 Leaflets                                |     |    |              |

**11. Which means have you used to know about this area in general**

(select more than one option if needed)

- On site material (posters, panels, leaflets)
- Internet
- Maps
- Books, magazines, etc.
- Tourist office
- Hotel/Restaurant
- Friends/people
- Personal experiences
- Other.....
- I haven't searched for any information

**12. If you received information about the area, how was it:**

(Choose only one option for each element)

- Complete, exhaustive
- Brief and concise
- Basic
- Bad

Notes:

Thank you very much for the collaboration.
